# Supplementary material
Source: PubMed Central journal article supplement (PMC7021583)
Supplement: NIHMS1037937-supplement-Supplemental_Material.pdf [file NIHMS1037937-supplement-Supplemental_Material.pdf]

Supplemental Materials

Measures

The University of New Orleans  
Alabama Parenting Questionnaire--Parent Form (partial form)  
**Parent Involvement Subscale**

Instructions: The following are a number of statements about your family. Using the following scale, please rate each item as to how often it TYPICALLY occurs in your home.

| 1     | 2            | 3         | 4     | 5      |
|-------|--------------|-----------|-------|--------|
| Never | Almost Never | Sometimes | Often | Always |

|                                                                                                                                        |   |   |   |   |   |
|----------------------------------------------------------------------------------------------------------------------------------------|---|---|---|---|---|
| 1. You have a friendly talk with your child                                                                                            | 1 | 2 | 3 | 4 | 5 |
| 2. You volunteer to help with special activities that your child is involved in (such as sports, boy/girl scouts, church youth groups) | 1 | 2 | 3 | 4 | 5 |
| 3. You play games or do other fun things with your child.                                                                              | 1 | 2 | 3 | 4 | 5 |
| 4. You ask your child about his/her day in school.                                                                                     | 1 | 2 | 3 | 4 | 5 |
| 5. You help your child with his/her homework.                                                                                          | 1 | 2 | 3 | 4 | 5 |
| 6. You ask your child what his/her plans are for the coming day.                                                                       | 1 | 2 | 3 | 4 | 5 |
| 7. You drive your child to a special activity.                                                                                         | 1 | 2 | 3 | 4 | 5 |
| 8. You talk to your child about his/her friends.                                                                                       | 1 | 2 | 3 | 4 | 5 |
| 9. Your child helps plan family activities.                                                                                            | 1 | 2 | 3 | 4 | 5 |
| 10. You attend PTA meetings, parent/teacher conferences, or other meetings at your child's school.                                     | 1 | 2 | 3 | 4 | 5 |

PARENTING SCALE (partial)  
(Arnold, O'Leary, Wolff, and Acker, 1993)  
**Overreactivity Subscale**

**For each item, circle the number that best describes your style of parenting during the past two months with your oldest child.**

**1. When I'm upset or under stress...**

I am picky and on my child's back. 1 2 3 4 5 6 7 I am no more picky than usual.

**2. When my child misbehaves...**

I usually get into a long argument with my child. 1 2 3 4 5 6 7 I don't get into an argument.

**5. When my child misbehaves...**

I give my child a long lecture. 1 2 3 4 5 6 7 I keep my talks short and to the point.

**6. When my child misbehaves...**

I raise my voice or yell. 1 2 3 4 5 6 7 I speak to my child calmly.

**8. After there's been a problem with child...**

I often hold a grudge. 1 2 3 4 5 6 7 things get back to normal quickly.

**11. When there's a problem with my child...**

things build up and I do things I don't mean to do. 1 2 3 4 5 6 7 things don't often get out of hand.

**12. When my child misbehaves, I spank, slap, grab or hit my child...**

never or rarely. 1 2 3 4 5 6 7 most of the time.

I often don't carry it out. 1 2 3 4 5 6 7 I always do what I say.

**16. When my child misbehaves...**

I handle it without getting upset. 1 2 3 4 5 6 7 I get so frustrated or angry that my child can see I'm upset.

**18. When my child misbehaves...**

I rarely use bad language or curse. 1 2 3 4 5 6 7 I almost always use bad language.

**20. When my child does something I don't like, I insult my child, say mean things or call my child names...**

never or rarely. 1 2 3 4 5 6 7 most of the time.

ABOUT YOUR JOB  
(O'Neil, 1991)  
**Autonomy**

This is a list of specific job characteristics. Please read each statement, and using the scale provided circle the number which best describes your situation at work.

| <u>1</u>          | <u>2</u>          | <u>3</u>                   | <u>4</u>       | <u>5</u>       |
|-------------------|-------------------|----------------------------|----------------|----------------|
| Strongly Disagree | Somewhat Disagree | Neither Agree nor Disagree | Somewhat Agree | Strongly Agree |

|                                                                                           |   |   |   |   |   |
|-------------------------------------------------------------------------------------------|---|---|---|---|---|
| 1. I have a lot of control over the way I use my time while I'm at work.                  | 1 | 2 | 3 | 4 | 5 |
| 2. I feel like I have a great deal of influence in the decision-making process on my job. | 1 | 2 | 3 | 4 | 5 |
| 3. I am able to vary the order that I complete my tasks at work each day.                 | 1 | 2 | 3 | 4 | 5 |
| 4. I'm given a chance to do the things I do best when I'm at work.                        | 1 | 2 | 3 | 4 | 5 |
| 5. I'm always able to make a personal phone call during my work hours.                    | 1 | 2 | 3 | 4 | 5 |
| 6. My job is often mentally demanding.                                                    | 1 | 2 | 3 | 4 | 5 |
| 7. I'm able to plan my work tasks to allow time for a private visitor during work hours.  | 1 | 2 | 3 | 4 | 5 |
| 8. I'm frequently expected to solve challenging problems at work.                         | 1 | 2 | 3 | 4 | 5 |
| 9. My job requires that I do the same things over and over.                               | 1 | 2 | 3 | 4 | 5 |
| 10. It's usually up to me to decide how to do a job once I've been given the assignment.  | 1 | 2 | 3 | 4 | 5 |
| 11. I do a lot of different things on my job.                                             | 1 | 2 | 3 | 4 | 5 |
| 12. I'm frequently required to deal with unexpected projects or tasks.                    | 1 | 2 | 3 | 4 | 5 |
| 13. I have the freedom to decide what I do on my job.                                     | 1 | 2 | 3 | 4 | 5 |
| 14. It is basically my responsibility to decide how my job gets done.                     | 1 | 2 | 3 | 4 | 5 |
| 15. I decide who I work with on my job.                                                   | 1 | 2 | 3 | 4 | 5 |

|                                                                     |   |   |   |   |   |
|---------------------------------------------------------------------|---|---|---|---|---|
| 16. I'm required to meet extremely high standards where I work.     | 1 | 2 | 3 | 4 | 5 |
| 17. The work I do is interesting.                                   | 1 | 2 | 3 | 4 | 5 |
| 18. I have an opportunity to develop my own special skills at work. | 1 | 2 | 3 | 4 | 5 |

Table B. Covariance Matrix of Indicator Variables.

|       | 1      | 2      | 3      | 4     | 5    | 6     | 7    | 8      | 9      | 10     | 11   | 12    | 13   | 14   | 15   | 16   | 17    | 18     | 19     | 20    | 21     | 22     |
|-------|--------|--------|--------|-------|------|-------|------|--------|--------|--------|------|-------|------|------|------|------|-------|--------|--------|-------|--------|--------|
| F_CBP | 63.65  |        |        |       |      |       |      |        |        |        |      |       |      |      |      |      |       |        |        |       |        |        |
| M_CBP | 31.19  | 76.80  |        |       |      |       |      |        |        |        |      |       |      |      |      |      |       |        |        |       |        |        |
| T_CBP | 22.04  | 18.10  | 56.26  |       |      |       |      |        |        |        |      |       |      |      |      |      |       |        |        |       |        |        |
| M_PO  | 1.76   | 2.59   | .54    | .58   |      |       |      |        |        |        |      |       |      |      |      |      |       |        |        |       |        |        |
| M_PI  | -.60   | 1.00   | -.34   | -.13  | .25  |       |      |        |        |        |      |       |      |      |      |      |       |        |        |       |        |        |
| F_PO  | 2.24   | 2.27   | .79    | .14   | -.01 | .50   |      |        |        |        |      |       |      |      |      |      |       |        |        |       |        |        |
| F_PI  | -.074  | -1.16  | -.09   | -.08  | .06  | -.09  | .24  |        |        |        |      |       |      |      |      |      |       |        |        |       |        |        |
| F_CAS | -31.91 | -37.59 | -12.16 | -2.75 | 1.63 | -2.29 | 1.83 | 68.05  |        |        |      |       |      |      |      |      |       |        |        |       |        |        |
| M_CAS | -17.30 | -46.05 | -13.30 | -2.73 | 2.23 | -.81  | 1.30 | 36.95  | 79.50  |        |      |       |      |      |      |      |       |        |        |       |        |        |
| T_CAS | -21.43 | -27.25 | -42.95 | -.09  | -.34 | -.83  | .32  | 13.79  | 8.50   | 83.49  |      |       |      |      |      |      |       |        |        |       |        |        |
| F_JA1 | -.35   | -.88   | .56    | -.08  | .05  | -.12  | .07  | .96    | -.01   | -.35   | .31  |       |      |      |      |      |       |        |        |       |        |        |
| F_JA2 | -.47   | -1.11  | .40    | -.06  | .05  | -.08  | .03  | 1.01   | .62    | -.15   | .21  | .31   |      |      |      |      |       |        |        |       |        |        |
| F_JA3 | -.37   | -.59   | .49    | -.02  | .02  | -.09  | .04  | .54    | -.07   | -.31   | .17  | .21   | .33  |      |      |      |       |        |        |       |        |        |
| M_JA1 | -1.45  | -1.87  | -1.17  | -.10  | .05  | -.04  | .03  | 1.02   | 1.39   | .42    | .03  | .02   | .04  | .32  |      |      |       |        |        |       |        |        |
| M_JA2 | -1.43  | -1.28  | -1.15  | -.06  | .04  | -.05  | .03  | .54    | .90    | .87    | .03  | .02   | .02  | .27  | .35  |      |       |        |        |       |        |        |
| M_JA3 | -1.13  | .08    | -.93   | -.05  | .04  | -.06  | -.04 | -.29   | -.18   | -.08   | .03  | -.002 | .02  | .24  | .30  | .49  |       |        |        |       |        |        |
| M_WH1 | -9.75  | -9.36  | -5.03  | .06   | .17  | -.23  | .16  | 7.63   | .31    | 10.83  | .52  | .09   | .01  | .71  | 1.06 | .91  | 38.21 |        |        |       |        |        |
| M_WH2 | -4.09  | -8.02  | -8.19  | .18   | -.15 | -1.27 | .02  | -4.53  | 2.67   | 12.47  | 1.98 | .88   | .89  | 1.45 | .93  | 2.07 | 24.02 | 108.81 |        |       |        |        |
| M_WH3 | -26.83 | -15.66 | -19.08 | .31   | -.60 | -2.22 | .01  | 7.94   | -10.84 | 9.16   | 1.52 | .76   | .83  | 2.23 | 1.67 | 2.79 | 24.60 | 72.63  | 158.88 |       |        |        |
| F_WH1 | -7.04  | -.01   | 4.17   | -.87  | .49  | -.63  | .18  | 6.19   | 4.44   | -14.32 | .42  | .32   | .52  | .29  | .14  | 1.16 | -1.27 | 8.28   | 11.42  | 64.78 |        |        |
| F_WH2 | -3.68  | -13.60 | 1.83   | -3.01 | .17  | -1.52 | .51  | -12.17 | 7.40   | -17.30 | -.03 | -.53  | -.42 | -.08 | -.97 | .34  | -7.53 | 12.24  | 24.29  | 19.84 | 166.79 |        |
| F_WH3 | -13.12 | 4.84   | -15.25 | -.92  | .12  | -1.02 | -.37 | -3.19  | -8.64  | 16.43  | .30  | .14   | .88  | -.08 | .36  | .59  | 5.78  | 8.99   | 11.13  | 27.12 | 18.46  | 114.36 |

Note. M = mother, F = father, T= teacher, CBP = child behavior problems, CAS =child adaptive skills, WH = work hours, JA = Job autonomy, PO = parent overreactivity, PI = parent involvement

Table C. *Parameter Estimates for the Direct Effects for Mediation Model Predicting Children's Behavioral Problems*

| Direct Effects               | Unstandardized Estimates | SE   | t            |
|------------------------------|--------------------------|------|--------------|
| <b>Mothers</b>               |                          |      |              |
| JA → PO                      | <b>-.39</b>              | .13  | <b>-2.99</b> |
| PO → CBP                     | <b>1.78</b>              | .69  | <b>2.59</b>  |
| JA → CBP                     | <b>-3.15</b>             | 1.00 | <b>-3.13</b> |
| JA → PI                      | <b>.17</b>               | .09  | <b>2.01</b>  |
| WH → PO                      | .04                      | .03  | 1.21         |
| WH → CBP                     | -.33                     | .25  | -1.32        |
| WH → PI                      | -.02                     | .02  | -.81         |
| PI → CBP                     | -1.32                    | 1.01 | -1.31        |
| <b>Fathers</b>               |                          |      |              |
| JA → PO                      | <b>-.27</b>              | .10  | <b>-2.62</b> |
| PO → CBP                     | <b>3.31</b>              | .81  | <b>4.09</b>  |
| JA → CBP                     | <b>2.17</b>              | .90  | <b>2.40</b>  |
| JA → PI                      | <b>.23</b>               | .07  | <b>3.07</b>  |
| WH → PO                      | -.03                     | .02  | -1.38        |
| WH → CBP                     | .09                      | .15  | .62          |
| WH → PI                      | -.004                    | .01  | -.27         |
| PI → CBP                     | -1.38                    | 1.01 | -1.36        |
| <b>Indirect Effects</b>      |                          |      |              |
| <b>Mothers</b>               | <b>-.92</b>              | .41  | <b>-2.54</b> |
| <b>Fathers</b>               | <b>-1.22</b>             | .48  | <b>-2.26</b> |
| <b>Model Comparison</b>      | <b>23.36 (4)</b>         |      |              |
| $\Delta\chi^2 (\Delta df)^a$ |                          |      |              |

Note: Values in bold font were statistically significant,  $p < .05$ . JA= Job Autonomy, PO= Parental Overreactivity, CBP =Child Behavioral Problems WH= Work Hours, PI=Parental Involvement. <sup>a</sup>Mediation models were compared to a model with paths from job autonomy to parenting mediators fixed to zero.

Table D. *Parameter Estimates for the Direct Effects for Mediation Model Predicting Children's Adaptive Skills*

|                                | <b>Unstandardized Estimates</b> | <b>SE</b> | <b>t</b>     |
|--------------------------------|---------------------------------|-----------|--------------|
| <b>Mothers' Direct Effects</b> |                                 |           |              |
| JA → PO                        | <b>-.47</b>                     | .20       | <b>-2.40</b> |
| PO → CAS                       | <b>-2.98</b>                    | .72       | <b>-4.17</b> |
| JA → CAS                       | 1.26                            | 1.37      | .92          |
| JA → PI                        | <b>.23</b>                      | .12       | <b>1.88</b>  |
| WH → PO                        | .05                             | .04       | 1.27         |
| WH → CAS                       | .18                             | .28       | .66          |
| WH → PI                        | -.02                            | .02       | -.95         |
| PI → CAS                       | <b>5.21</b>                     | 1.11      | <b>4.70</b>  |
| <b>Fathers' Direct Effects</b> |                                 |           |              |
| JA → PO                        | <b>-.26</b>                     | .10       | <b>-2.49</b> |
| PO → CAS                       | <b>-2.79</b>                    | .86       | <b>-3.23</b> |
| JA → CAS                       | <b>-2.21</b>                    | .94       | <b>-2.36</b> |
| JA → PI                        | <b>.22</b>                      | .07       | <b>3.02</b>  |
| WH → PO                        | -.05                            | .03       | -1.60        |
| WH → CAS                       | <b>-.61</b>                     | .31       | <b>-1.97</b> |
| WH → PI                        | -.002                           | .02       | -.10         |
| PI → CAS                       | <b>3.93</b>                     | 1.13      | <b>3.47</b>  |
| <b>Indirect Effects</b>        |                                 |           |              |
| <b>Mothers</b>                 | <b>2.60</b>                     | .41       | <b>2.37</b>  |
| <b>Fathers</b>                 | <b>1.58</b>                     | .53       | <b>2.98</b>  |
| <b>Model Comparison</b>        | <b>19.97 (4)</b>                |           |              |
| $\Delta\chi^2 (\Delta df)^a$   |                                 |           |              |

Note: Values in bold font were statistically significant,  $p < .05$ . JA= Job Autonomy, PO= Parental Overreactivity, CAS=Child Adaptive Skills, WH= Work Hours, PI=Parental Involvement

<sup>a</sup>Mediation models were compared to a model with paths from job autonomy to parenting mediators fixed to zero.

Table E. *Standardized Coefficients for Mediational Models without and with Covariates.*

| <i>Direct Effects</i>   | <b>Behavior Problems</b> |                        | <b>Adaptive Skills</b> |                        |
|-------------------------|--------------------------|------------------------|------------------------|------------------------|
|                         | <b>No Covariates</b>     | <b>With Covariates</b> | <b>No Covariates</b>   | <b>With Covariates</b> |
| <b>Mothers</b>          |                          |                        |                        |                        |
| JA → PO                 | <b>-.29</b>              | <b>-.28</b>            | <b>-.30</b>            | <b>-.29</b>            |
| PO → DV                 | <b>.26</b>               | <b>.16</b>             | <b>-.38</b>            | <b>-.21</b>            |
| JA → DV                 | <b>-.34</b>              | <b>-.23</b>            | .10                    | <b>.17</b>             |
| JA → PI                 | <b>.20</b>               | <b>.18</b>             | <b>.22</b>             | <b>.17</b>             |
| WH → PO                 | .14                      | .16                    | .16                    | .17                    |
| WH → DV                 | -.18                     | -.24                   | .08                    | .10                    |
| WH → PI                 | -.09                     | -.09                   | -.12                   | -.09                   |
| PI → DV                 | -.13                     | <b>-.18</b>            | <b>.43</b>             | <b>.47</b>             |
| <b>Fathers</b>          |                          |                        |                        |                        |
| JA → PO                 | <b>-.22</b>              | <b>-.24</b>            | <b>-.21</b>            | <b>-.22</b>            |
| PO → DV                 | <b>.44</b>               | <b>.35</b>             | <b>-.32</b>            | <b>-.27</b>            |
| JA → DV                 | <b>.23</b>               | .18                    | <b>-.20</b>            | -.16                   |
| JA → PI                 | <b>.26</b>               | <b>.27</b>             | <b>.25</b>             | <b>.26</b>             |
| WH → PO                 | -.19                     | -.02                   | -.24                   | -.03                   |
| WH → DV                 | .09                      | -.03                   | <b>-.36</b>            | -.08                   |
| WH → PI                 | -.03                     | <b>-.16</b>            | -.01                   | -.16                   |
| PI → DV                 | -.13                     | <b>-.18</b>            | <b>.32</b>             | <b>.37</b>             |
| <i>Indirect Effects</i> |                          |                        |                        |                        |
| <b>Mothers</b>          | <b>-.10</b>              | <b>-.08</b>            | <b>.21</b>             | <b>.16</b>             |
| <b>Fathers</b>          | <b>-.13</b>              | <b>-.13</b>            | <b>.15</b>             | <b>.14</b>             |
| <i>Covariates</i>       |                          |                        |                        |                        |
| INC → DV                | --                       | -.07                   | --                     | -.22                   |
| EDU → DV                | --                       | -.12                   | --                     | .23                    |
| BOY → DV                | --                       | <b>.50</b>             | --                     | <b>-.30</b>            |

Note: Values in bold font were statistically significant,  $p < .05$ . JA= Job Autonomy, PO= Parental Overreactivity, DV =Dependent Variable (indicated in column headings), WH= Work Hours, PI=Parental Involvement, INC=Income, EDU=Level of Education, BOY=indicator for male sex.
